# Supplementary material for: The Chemo-Gut Study: A Cross-Sectional Survey Exploring Physical, Mental, and Gastrointestinal Health Outcomes in Cancer Survivors
Source: PubMed Central journal article supplement — Glob Adv Health Med. 2022 Dec 21;11:2164957X221145940. doi: 10.1177/2164957X221145940 (PMC9793028; doi:10.1177/2164957x221145940), 2022-12-21
Supplement: sj-pdf-1-gam-10.1177_2164957X221145940.pdf [file sj-pdf-1-gam-10.1177_2164957X221145940.pdf]

Table S1. Sample demographics (Sample N= 317)

| Demographic Study Variable              | Mean              |      |
|-----------------------------------------|-------------------|------|
|                                         | n                 | %    |
| <i>Current age</i>                      | 49.63 (SD= 14.77) |      |
| <i>Sex</i>                              |                   |      |
| Male                                    | 49                | 15.5 |
| Female                                  | 267               | 84.2 |
| Other                                   | 1                 | 0.3  |
| <i>Ethnicity</i>                        |                   |      |
| Caucasian/white                         | 293               | 92.4 |
| First Nations                           | 3                 | 0.9  |
| African American/Black                  | 1                 | 0.3  |
| South Asian/Chinese/Filipino            | 5                 | 1.6  |
| Indian-subcontinent                     | 4                 | 1.3  |
| Other                                   | 11                | 3.5  |
| <i>Education</i>                        |                   |      |
| High school                             | 41                | 12.9 |
| Trade school                            | 12                | 3.8  |
| Community College                       | 70                | 22.1 |
| University (undergraduate)              | 111               | 35.0 |
| University (professional/post-graduate) | 82                | 25.9 |
| No response                             | 1                 | 0.3  |
| <i>Income</i>                           |                   |      |
| less than \$30,000                      | 57                | 18.0 |
| \$30,000 to less than \$50,000          | 67                | 21.1 |
| \$50,000 to less than \$80,000          | 83                | 26.2 |
| \$80,000 to less than \$120,000         | 70                | 22.1 |
| greater than \$120,000                  | 31                | 9.8  |
| No response                             | 9                 | 2.8  |
| <i>Marital Status</i>                   |                   |      |
| Single (never legally married)          | 70                | 22.1 |
| Married                                 | 151               | 47.6 |
| Common-law                              | 49                | 15.5 |
| Divorced                                | 20                | 6.3  |
| Separated                               | 14                | 4.4  |
| Widowed                                 | 11                | 3.5  |
| No response                             | 2                 | 0.6  |
| <i>Community</i>                        |                   |      |
| Metropolitan                            | 232               | 73.2 |
| Regional/remote                         | 80                | 25.2 |
| No response                             | 5                 | 1.6  |
| <i>Province</i>                         |                   |      |
| Alberta                                 | 113               | 35.6 |
| British Columbia                        | 30                | 9.5  |
| Manitoba                                | 23                | 7.3  |

|                           |     |      |
|---------------------------|-----|------|
| New Brunswick             | 5   | 1.6  |
| Newfoundland and Labrador | 2   | 0.6  |
| Nova Scotia               | 8   | 2.5  |
| Ontario                   | 112 | 35.3 |
| Quebec                    | 13  | 4.1  |
| Saskatchewan              | 10  | 3.2  |
| No response               | 1   | 0.3  |
